# Supplementary material
Source: publisher figshare collection journal article supplement (https://sage.figshare.com/ndownloader/files/15025946)
Supplement: Supplementary file 1 [file 15025946]

## Appendix

**Appendix table 1: Calibration of examiner 1 for ICDAS criteria against a gold standard**

|                                          | Gold standard |         |         |         |         |         |         | Total<br>surfaces |
|------------------------------------------|---------------|---------|---------|---------|---------|---------|---------|-------------------|
|                                          | ICDAS 0       | ICDAS 1 | ICDAS 2 | ICDAS 3 | ICDAS 4 | ICDAS 5 | ICDAS 6 |                   |
| ICDAS 0                                  | 130           | 0       | 0       | 0       | 0       | 0       | 0       | 130               |
| ICDAS 1                                  | 6             | 2       | 0       | 0       | 0       | 0       | 0       | 8                 |
| ICDAS 2                                  | 4             | 0       | 0       | 0       | 0       | 0       | 0       | 4                 |
| ICDAS 3                                  | 0             | 0       | 2       | 0       | 0       | 0       | 0       | 2                 |
| ICDAS 4                                  | 0             | 0       | 0       | 0       | 1       | 0       | 0       | 1                 |
| ICDAS 5                                  | 0             | 0       | 0       | 0       | 0       | 3       | 0       | 3                 |
| ICDAS 6                                  | 0             | 0       | 0       | 0       | 1       | 0       | 1       | 2                 |
| <b>Examiner 1<br/>Total<br/>surfaces</b> | 140           | 2       | 0       | 2       | 2       | 3       | 1       | 150               |

*Table indicates the number of surfaces examined by each examiner.*

*Number of observed agreements: 139 (92.67% of the observations)*

*Number of agreements expected by chance: 121.6 (81.04% of the observations)*

*Weighted Kappa= 0.810*

*SE of kappa = 0.102*

*95% confidence interval: From 0.414 to 0.813*

**Appendix table 2: Calibration of examiner 2 for ICDAS criteria against a gold standard**

|                                          | Gold standard |         |         |         |         |         |         | Total<br>surfaces |
|------------------------------------------|---------------|---------|---------|---------|---------|---------|---------|-------------------|
|                                          | ICDAS 0       | ICDAS 1 | ICDAS 2 | ICDAS 3 | ICDAS 4 | ICDAS 5 | ICDAS 6 |                   |
| ICDAS 0                                  | 137           | 1       | 0       | 0       | 0       | 0       | 0       | 138               |
| ICDAS 1                                  | 2             | 1       | 0       | 0       | 0       | 0       | 0       | 3                 |
| ICDAS 2                                  | 1             | 0       | 1       | 0       | 0       | 0       | 0       | 2                 |
| ICDAS 3                                  | 0             | 0       | 0       | 2       | 0       | 0       | 0       | 2                 |
| ICDAS 4                                  | 0             | 0       | 0       | 0       | 1       | 0       | 0       | 1                 |
| ICDAS 5                                  | 0             | 0       | 0       | 0       | 0       | 3       | 0       | 3                 |
| ICDAS 6                                  | 0             | 0       | 0       | 0       | 0       | 0       | 1       | 1                 |
| <b>Examiner 2<br/>Total<br/>surfaces</b> | 140           | 2       | 1       | 2       | 1       | 3       | 1       | 150               |

*Table indicates the number of surfaces examined by each examiner.*

*Number of observed agreements: 146 (97.33% of the observations)*

*Number of agreements expected by chance: 129.0 (85.97% of the observations)*

*Weighted Kappa= 0.928*

*SE of kappa = 0.093*

*95% confidence interval: From 0.628 to 0.992*
